# Supplementary material for: Distribution of Stable DnaA-Binding Sites on the Bacillus Subtilis Genome Detected using a Modified ChIP-chip Method
Source: PubMed Central journal article supplement — DNA Res. 2007 Oct 10;14(4):155–68. doi: 10.1093/dnares/dsm017 (PMC2533591; doi:10.1093/dnares/dsm017), 2007-10-10

**Table S1. Primers used for the construction of plasmids used in this study**

| Primer       | Sequence <sup>a</sup>                              | Location on the genome <sup>b</sup> |
|--------------|----------------------------------------------------|-------------------------------------|
| dnaA.f       | cg <u>gaattc</u> TTATTACAGATATCACACCG <sup>c</sup> | 1215...1234                         |
| dnaA.r       | gcg <u>ccggg</u> TTTAAGCTGTTCTTTAATTTCTTTTAC       | 1747...1721                         |
| spo0J.f      | cg <u>gaattc</u> AGCGTGAAGATTTATCTCCG              | 4204583...4204603                   |
| spo0J.r      | gcg <u>ctcgag</u> TGATTCTCGTTCAGACAAAAG            | 4205088...4205069                   |
| 1dnaA-HiF    | cg <u>caagctt</u> GATCTAGAAACGAGAATTGC             | 1238...1257                         |
| 1dnaA-LinkR  | tgcatcctctcattcaagTTTAAGCTGTTCTTTAATTTTC           | 1747...1727                         |
| 2dnaA-HisF   | caccaccatcatcaccatTAGCAGGACCGGGGATCAATC            | 1748...1768                         |
| 2dnaA-BaR    | gcg <u>ggatcc</u> TCGTCAAATACTGATTTTGG             | 2251...2232                         |
| Linker-12His | cttgaatgagaggatcgcatcaccatcaccatcaccaccatcatcaccat |                                     |

<sup>a</sup> Capital and lowercase letters indicate sequences derived from *the B. subtilis* genome and others, respectively.

<sup>b</sup> Numbers refer to the SubtiList database (<http://genolist.pasteur.fr/SubtiList/index.html>).

<sup>c</sup> Underlined sequences represent the recognition sites of restriction enzymes.

**Table S2. Genes up- or downregulated by DnaA**

| gene <sup>a</sup>                         | x1/5 DnaA <sup>b</sup> | x5 DnaA <sup>c</sup> | ratio | function                                                         |
|-------------------------------------------|------------------------|----------------------|-------|------------------------------------------------------------------|
| <b>downregulated</b>                      |                        |                      |       |                                                                  |
| <i>dnaA</i> ( <i>dnaAN</i> ) <sup>d</sup> | 0.65                   | 0.39                 | 0.13  | replication                                                      |
| <i>dnaN</i> ( <i>dnaAN</i> ) <sup>d</sup> | 0.48                   | 0.18                 | 0.38  | replication                                                      |
| <i>ykuN</i> ( <i>ykuNPO</i> )             | 1.58                   | 0.73                 | 0.46  | similar to flavodoxin                                            |
| <i>ykuO</i> ( <i>ykuNPO</i> )             | 1.84                   | 0.73                 | 0.40  | unknown                                                          |
| <i>ykuP</i> ( <i>ykuNPO</i> )             | 2.22                   | 0.89                 | 0.40  | similar to flavodoxin                                            |
| <i>dhbA</i> ( <i>dhbACEB</i> )            | 1.04                   | 0.59                 | 0.57  | biosynthesis of siderophore group nonribosomal peptides          |
| <i>ywIC</i>                               | 0.70                   | 0.34                 | 0.49  | unknown                                                          |
| <i>yydA</i>                               | 0.70                   | 0.45                 | 0.64  | unknown                                                          |
| <i>noc</i> ( <i>thdF/gidA/gidB/noc</i> )  | 2.78                   | 1.76                 | 0.63  | cell division                                                    |
| <i>gidB</i> ( <i>thdF/gidA/gidB/noc</i> ) | 3.11                   | 1.70                 | 0.55  | translation                                                      |
| <i>gidA</i> ( <i>thdF/gidA/gidB/noc</i> ) | 2.10                   | 1.16                 | 0.55  | translation                                                      |
| <i>thdF</i> ( <i>thdF/gidA/gidB/noc</i> ) | 1.77                   | 1.00                 | 0.56  | translation                                                      |
| <b>upregulated</b>                        |                        |                      |       |                                                                  |
| <i>sda</i> <sup>d</sup>                   | 1.17                   | 3.52                 | 3.00  | sporulation                                                      |
| <i>yveL</i> ( <i>yveKL</i> )              | 0.19                   | 0.56                 | 2.95  | similar to capsular polysaccharide biosynthesis protein          |
| <i>yveK</i> ( <i>yveKL</i> )              | 0.24                   | 0.65                 | 2.71  | similar to capsular polysaccharide biosynthesis protein          |
| <i>yvdD</i> ( <i>yvdD&lt;-&gt;yvdC</i> )  | 1.01                   | 2.88                 | 2.85  | unknown                                                          |
| <i>yvdC</i> ( <i>yvdD&lt;-&gt;yvdC</i> )  | 1.28                   | 3.60                 | 2.81  | unknown protein with MazG nucleotide pyrophosphohydrolase domain |
| <i>rocA</i>                               | 0.34                   | 1.97                 | 5.79  | arginine catabolism                                              |
| <i>rocD</i> ( <i>rocCDE</i> )             | 0.76                   | 2.06                 | 2.71  | arginine and proline metabolism                                  |

<sup>a</sup> Genes that are downregulated (<0.65) and upregulated (>2.5) in a DnaA-dependent manner in two independent experiments are specified. The operon structure is indicated in parentheses.

<sup>b</sup> Expression levels in NIS2022 cells grown in the absence of IPTG to repress the DnaA level to 1/5 times that in the wild-type strain, CRK6000. Expression level is the average of signal intensities of probes in coding sequences after trimming two of the lowest and highest intensities.

<sup>c</sup> Expression level in NIS2022 cells grown in the presence of 0.1M IPTG to stimulate the DnaA level to 5 times that in the wild-type strain, CRK6000.

<sup>d</sup> Expression levels of *dnaA*, *dnaN* and *sda* were calculated using probes in regions 168..333, 1751..1938, and 2646601..2646849, respectively.

Figure S1

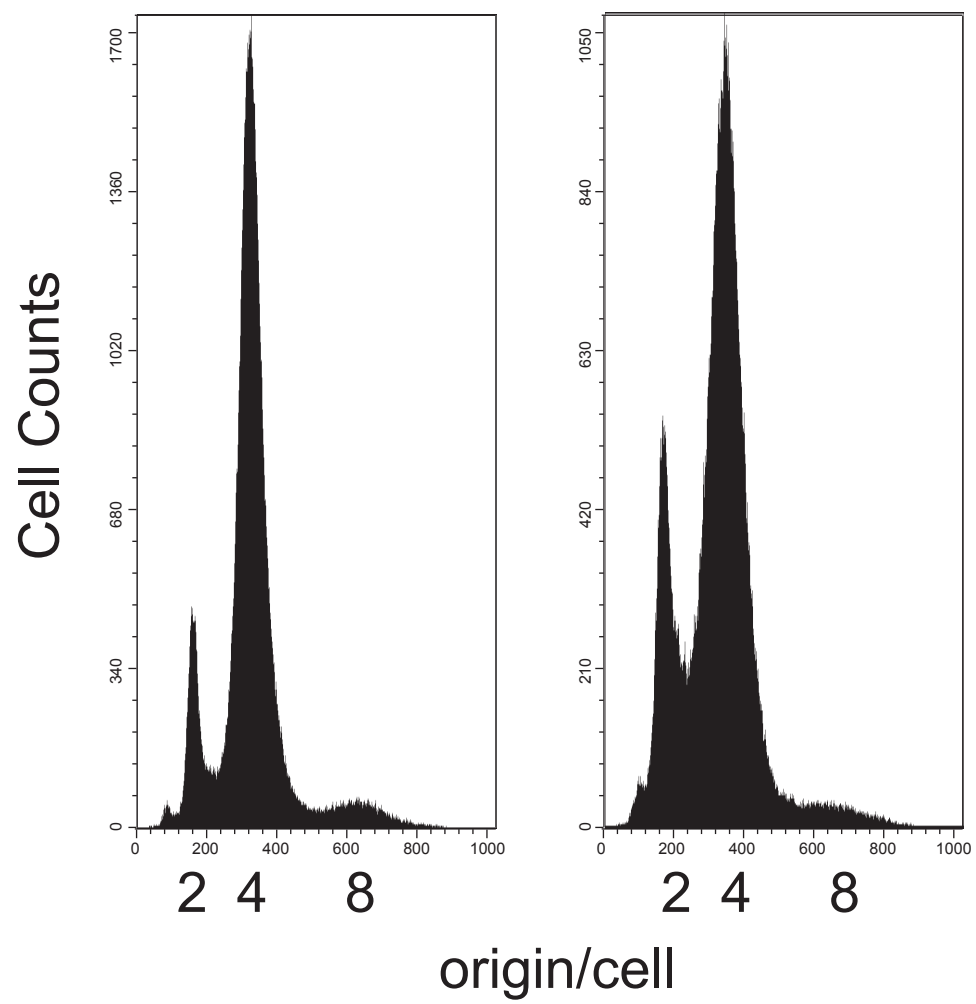





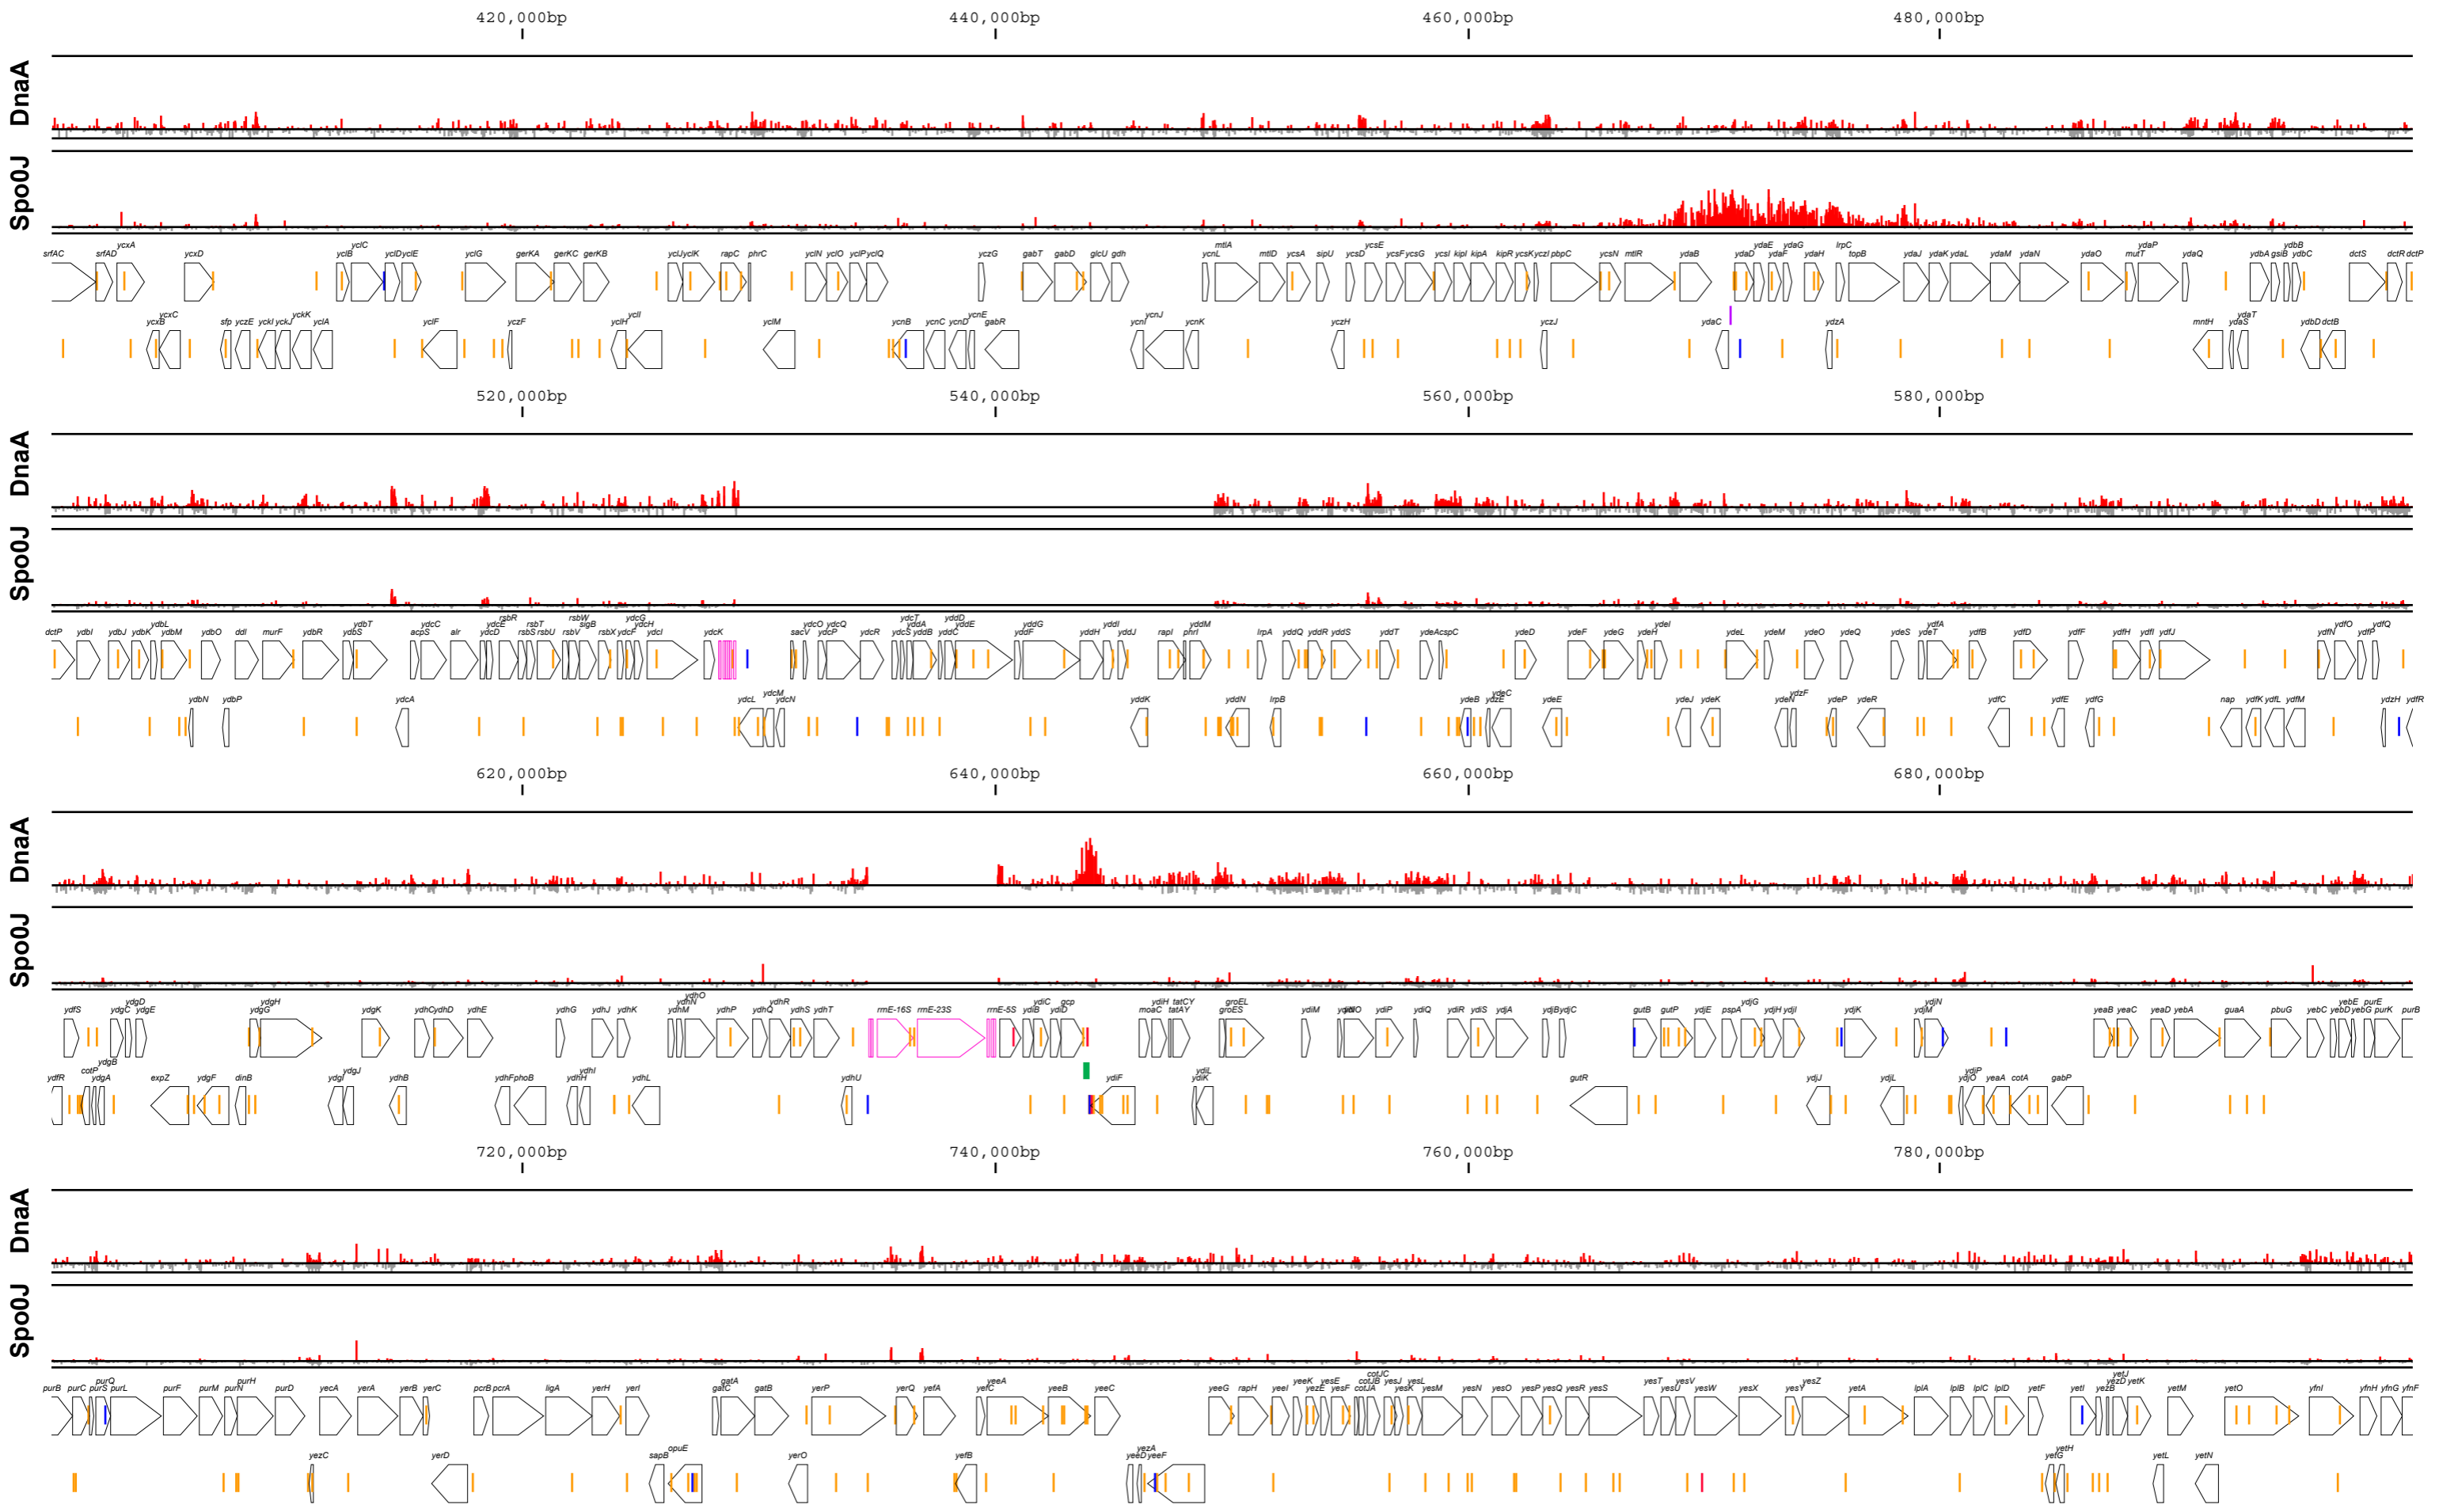

Figure S2-2





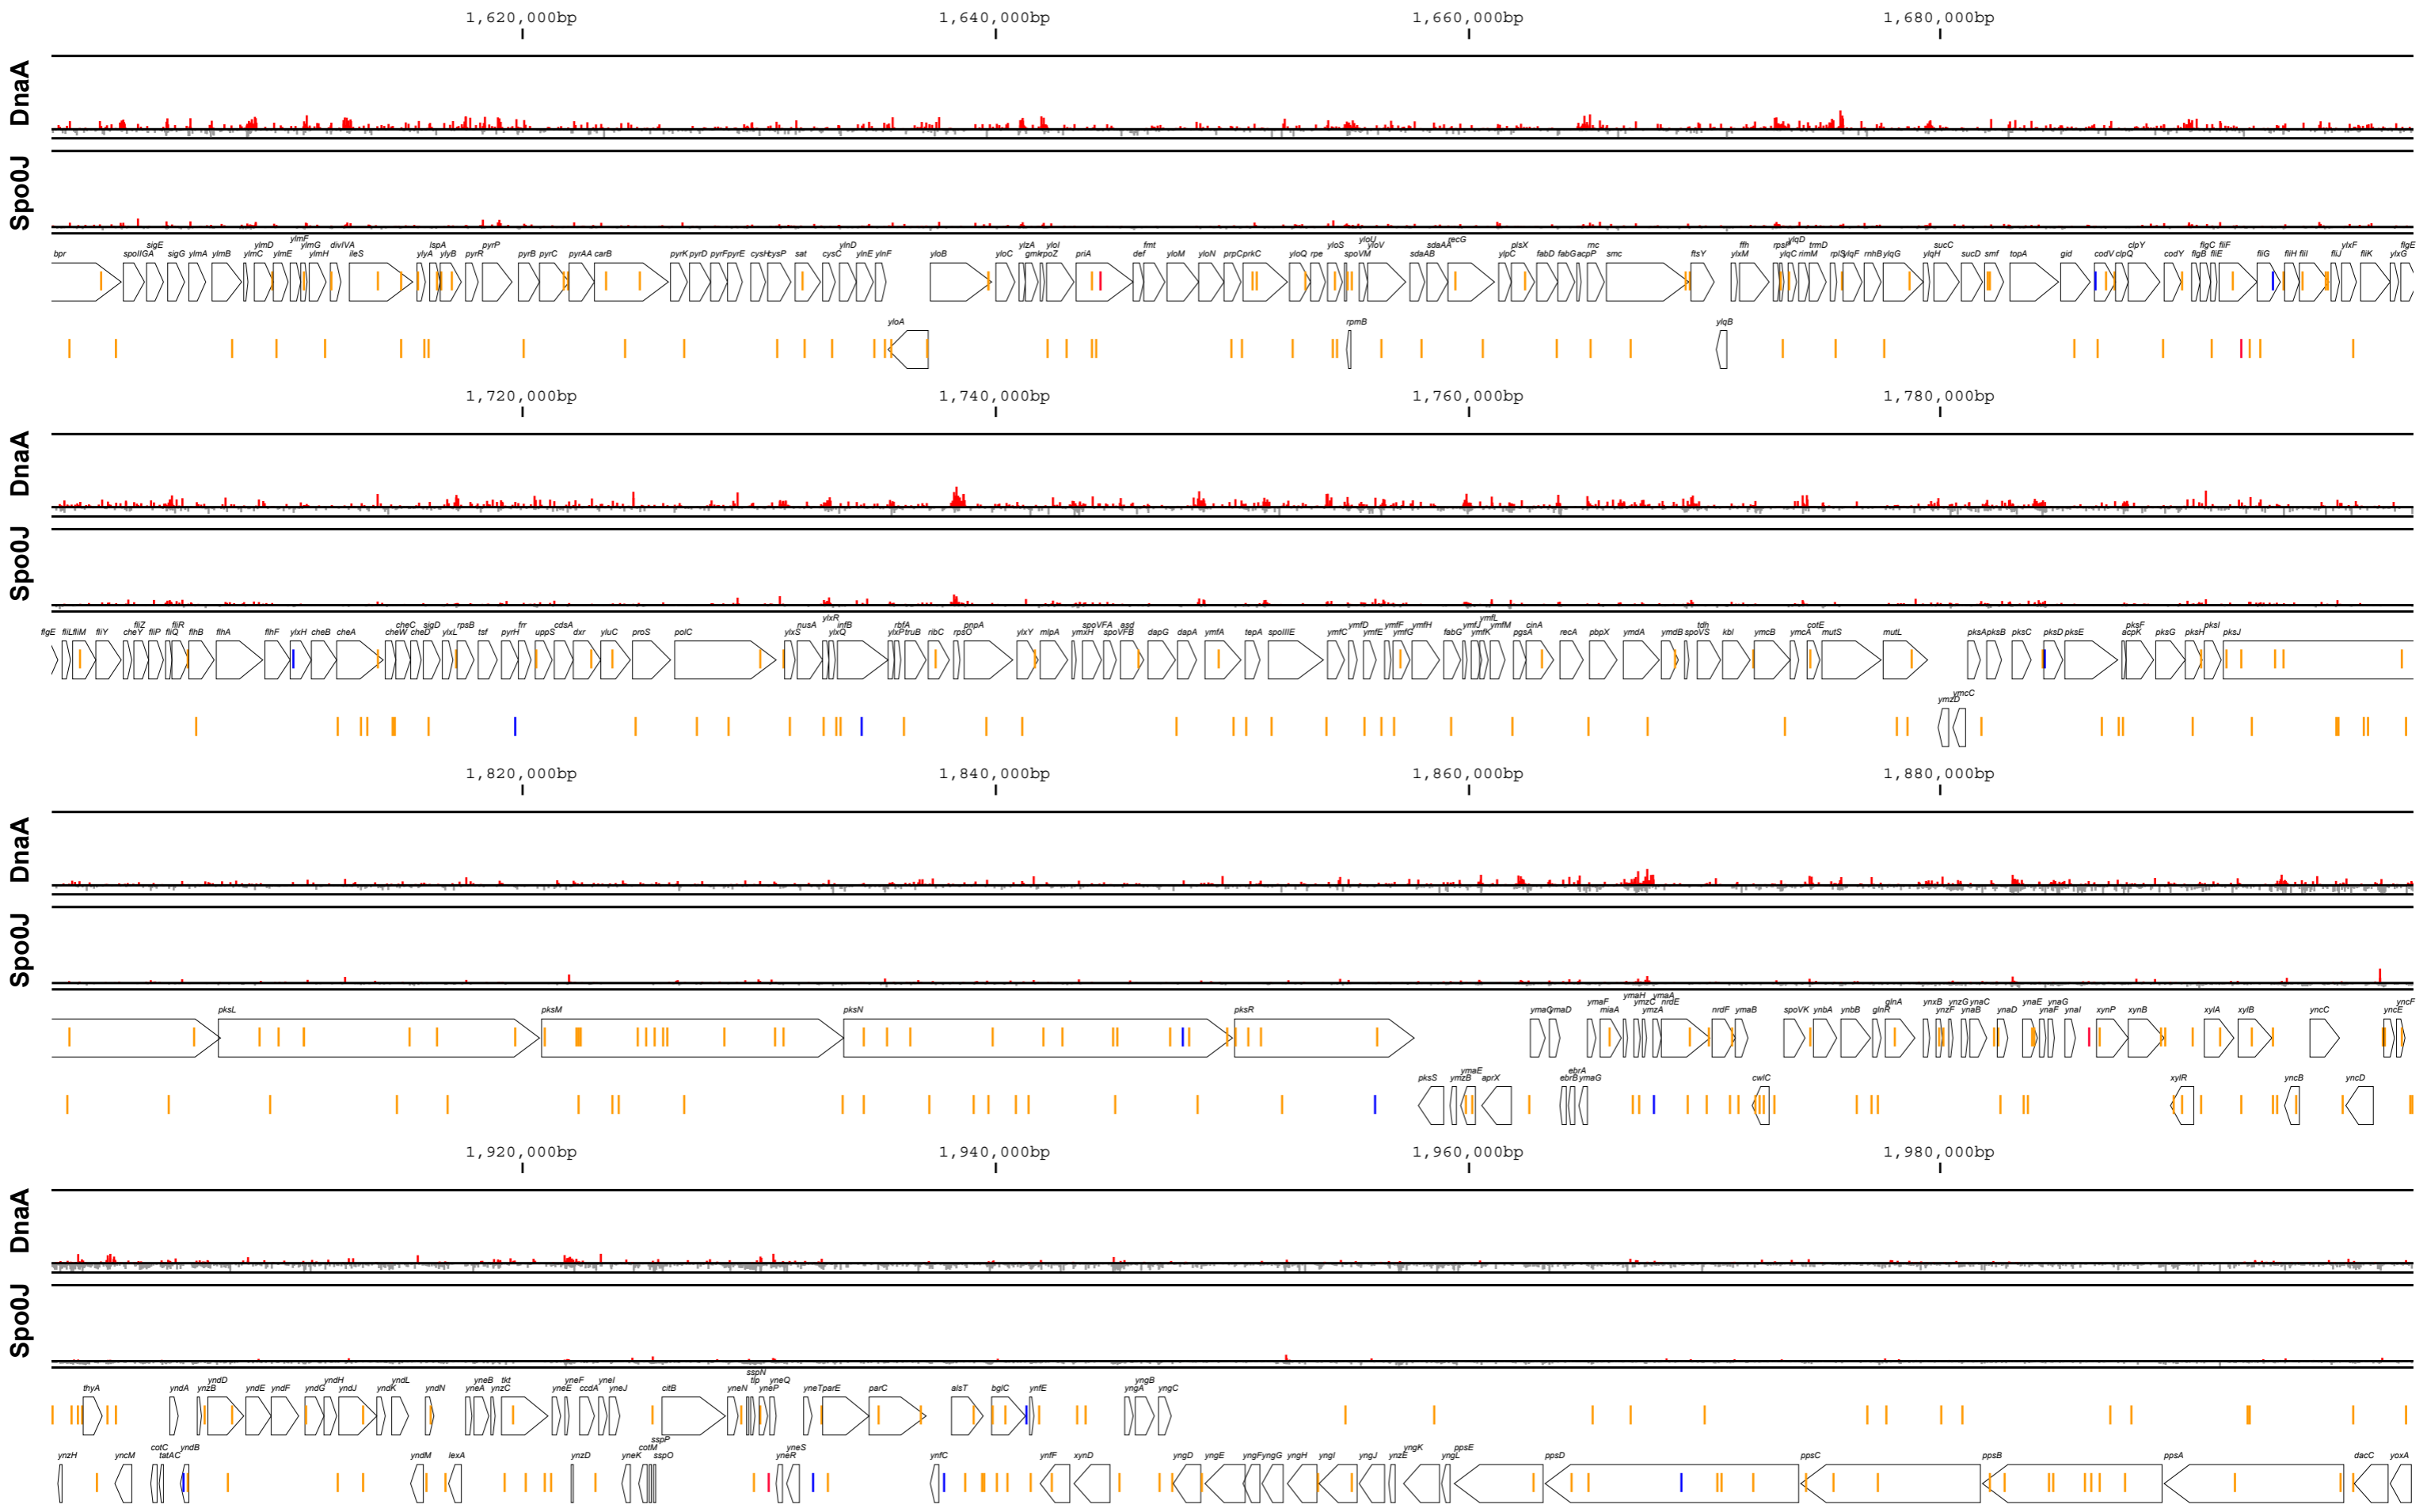

Figure S2-5













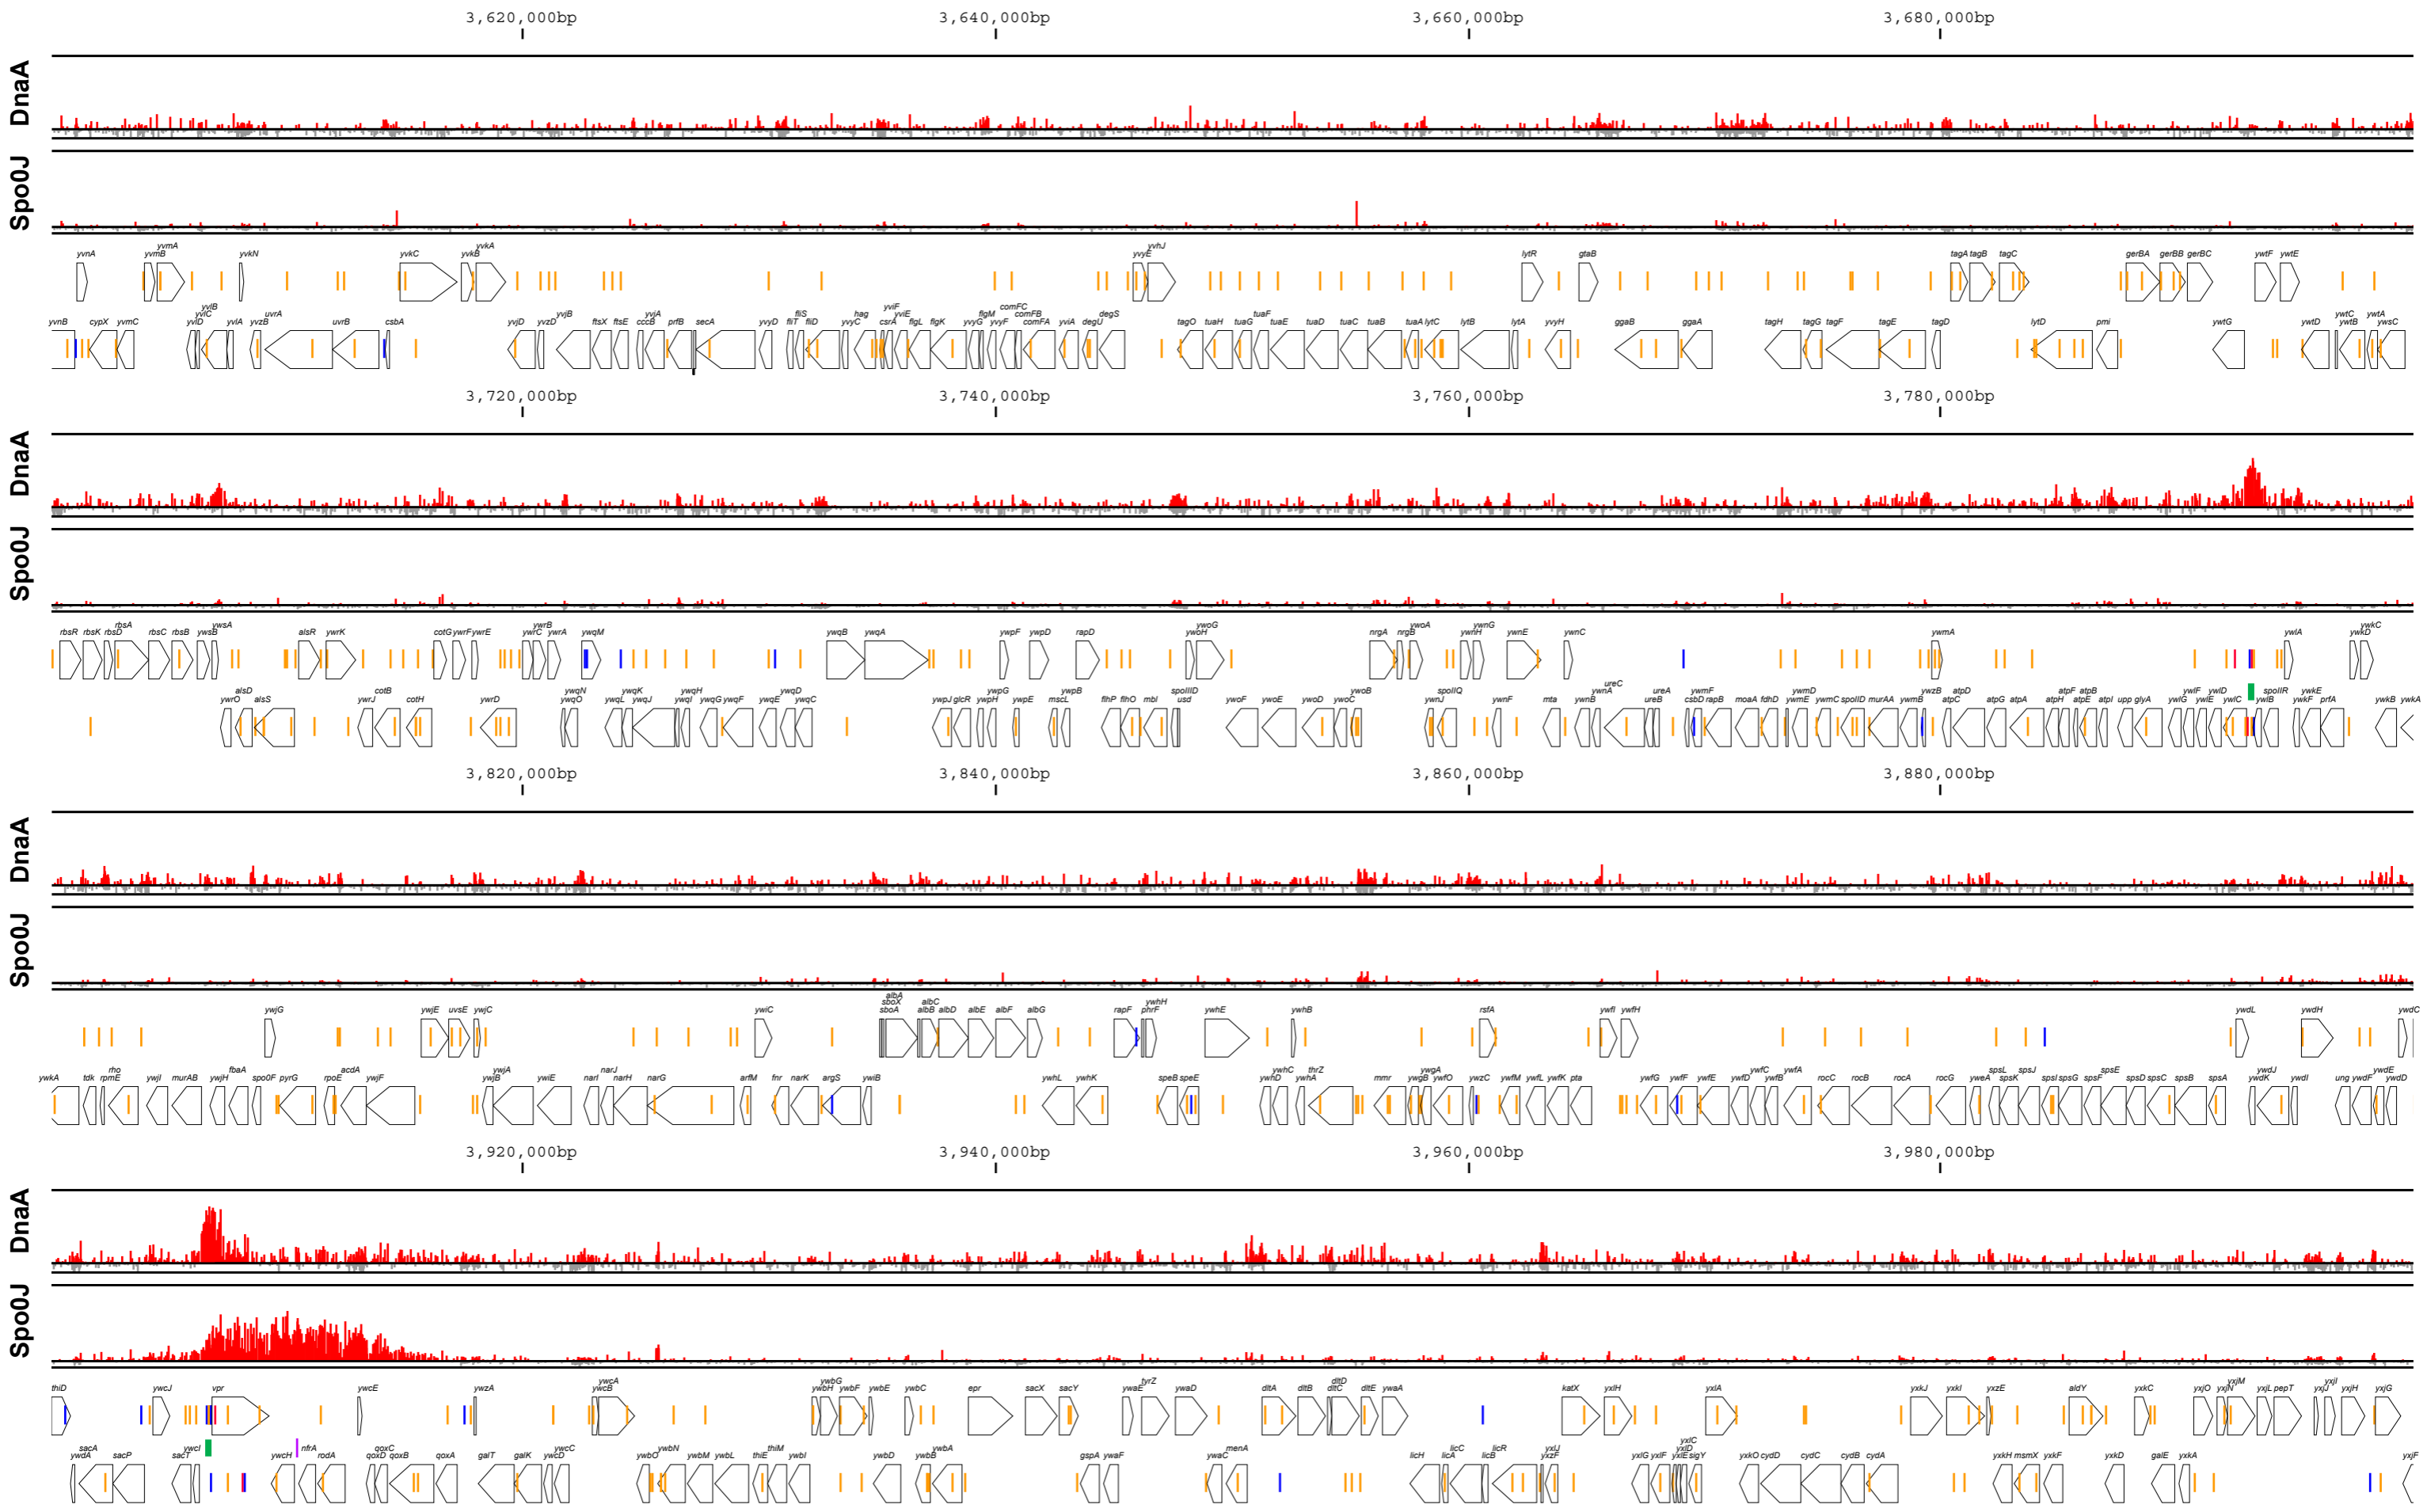

Figure S2-10



Figure S3

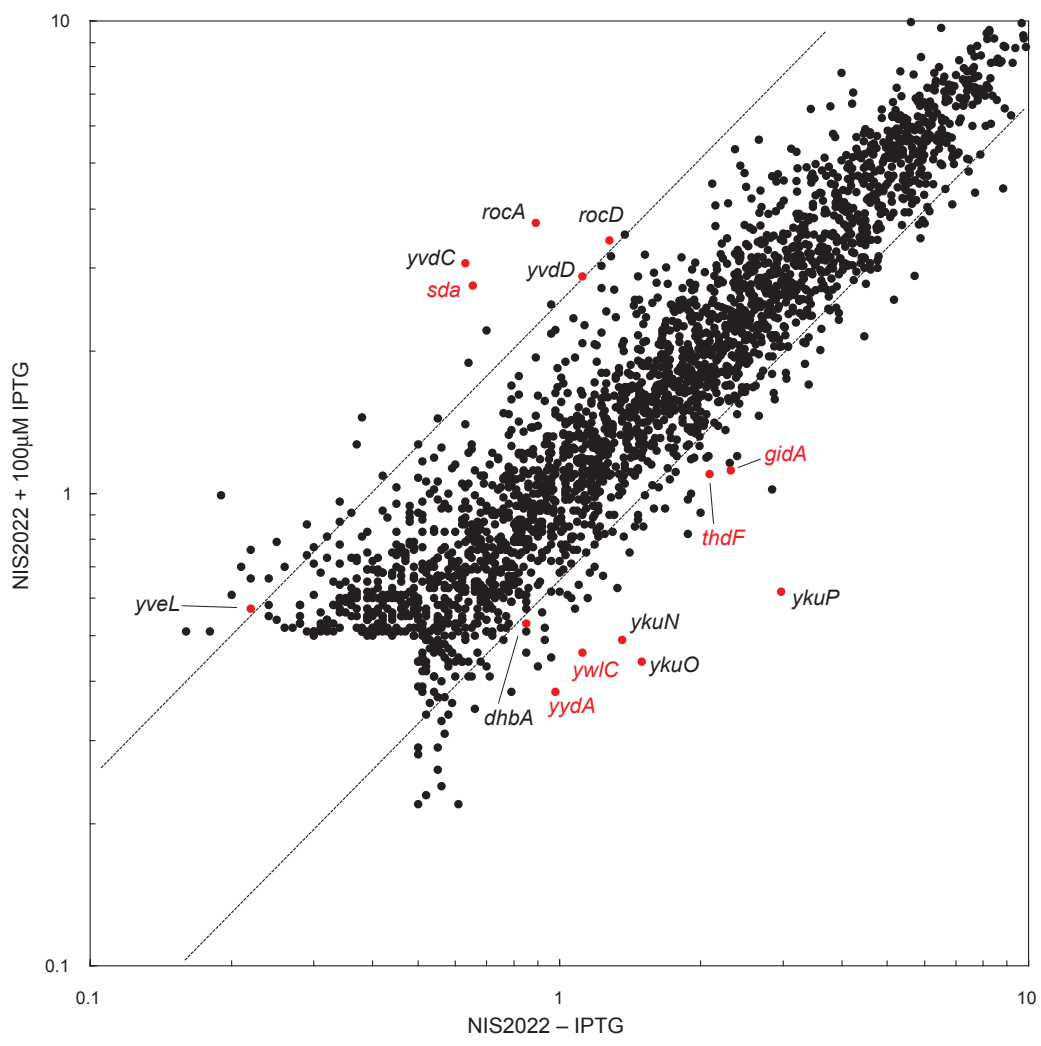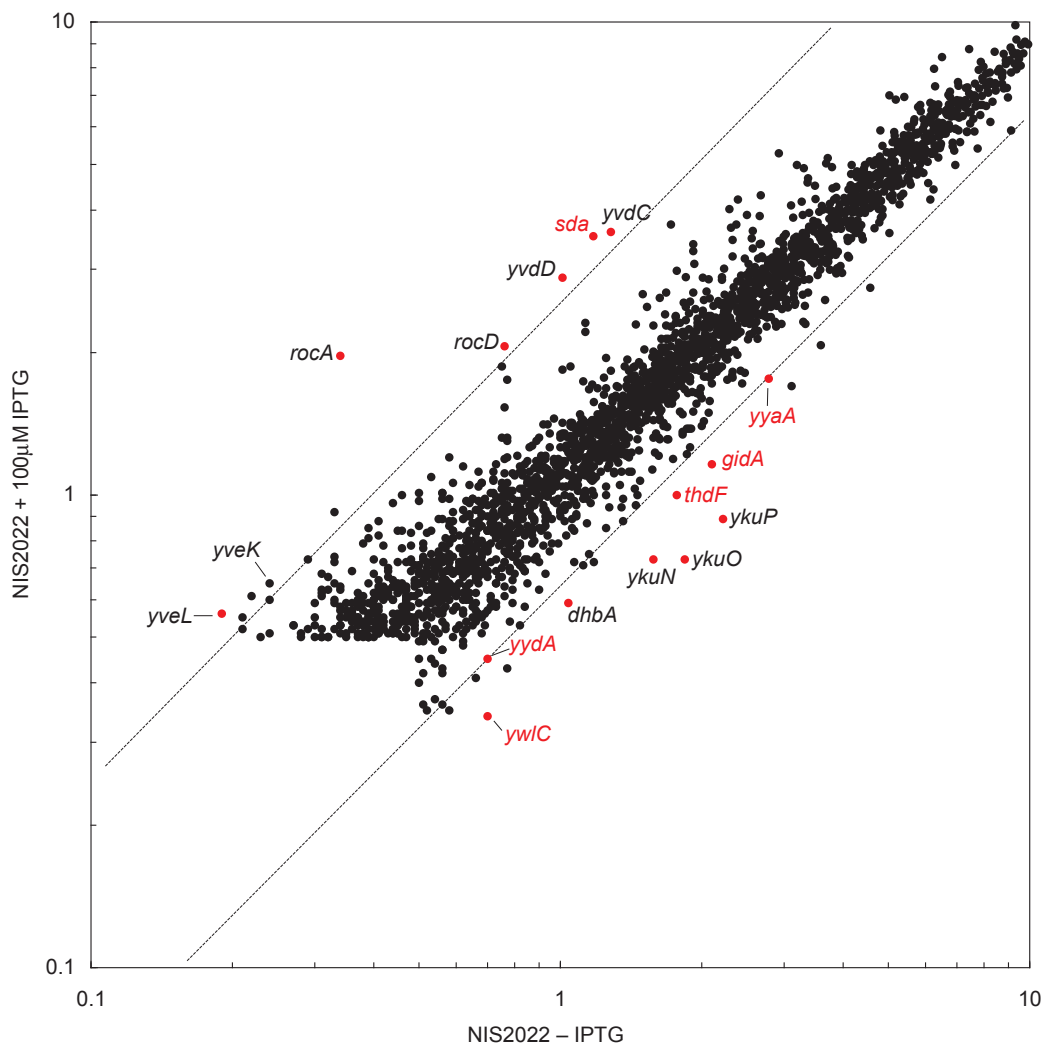

Supplement: dsm017_1.pdf [file dsm017_1.pdf]
